# Supplementary material
Source: PubMed Central journal article supplement (PMC7707165)
Supplement: supp_RA120000924_161021_3_supp_604760_qhfydb.pdf [file supp_RA120000924_161021_3_supp_604760_qhfydb.pdf]

**SUPPLEMENTAL INFORMATION:**

**Insulin resistance dysregulates CYP7B1 leading to oxysterol accumulation: a pathway for NAFL to  
NASH transition**

Genta Kakiyama<sup>1,2\*</sup>, Dalila Marques<sup>1,2</sup>, Rebecca Martin<sup>3</sup>, Hajime Takei<sup>4</sup>, Daniel Rodriguez-Agudo<sup>1,2</sup>,  
Sandra A. LaSalle<sup>2</sup>, Taishi Hashiguchi<sup>5</sup>, Xiaoying Liu<sup>6</sup>, Richard Green<sup>6</sup>, Sandra Erickson<sup>7</sup>, Gregorio Gil<sup>8,9</sup>,  
Michael Fuchs<sup>1,2</sup>, Mitsuyoshi Suzuki<sup>10</sup>, Tsuyoshi Murai<sup>11</sup>, Hiroshi Nittono<sup>4</sup>, Phillip B. Hylemon<sup>2,3,9</sup>,  
Huiping Zhou<sup>2,3,9</sup>, and William M. Pandak<sup>1,2,9</sup>

<sup>1</sup> Department of Internal Medicine, Virginia Commonwealth University, Richmond, VA

<sup>2</sup> Department of Veterans Affairs, McGuire VA Medical Center, Richmond, VA

<sup>3</sup> Department of Microbiology and Immunology, Virginia Commonwealth University, Richmond, VA

<sup>4</sup> Junshin Clinic Bile Acid Institute, Tokyo, Japan

<sup>5</sup> SMC Laboratories Inc, Tokyo, Japan

<sup>6</sup> Department of Medicine, Northwestern University, Chicago IL

<sup>7</sup> School of Medicine, University of California, San Francisco, CA

<sup>8</sup> Department of Biochemistry and Molecular Biology, Virginia Commonwealth University, Richmond, VA

<sup>9</sup> Massey Cancer Center, Virginia Commonwealth University, Richmond, VA

<sup>10</sup> Department of Pediatrics, Juntendo University Faculty of Medicine, Tokyo, Japan

<sup>11</sup> School of Pharmaceutical Sciences, Health Sciences University of Hokkaido, Hokkaido, Japan

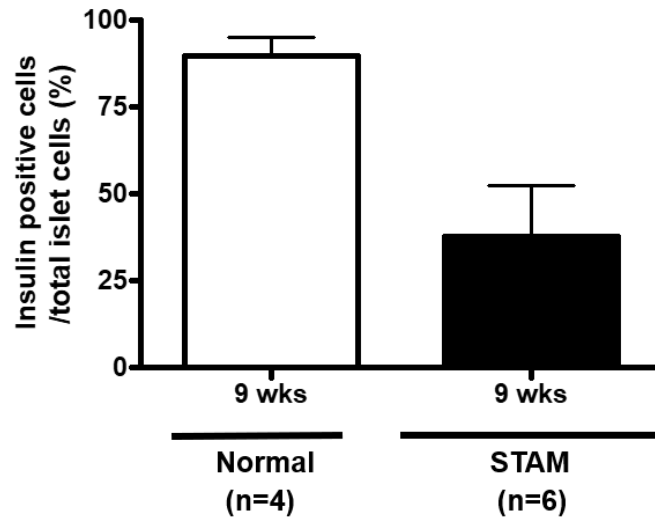

**Supplemental Figure S1: Insulin positive cells of the 9-week-old STAM<sup>TM</sup> mice.** Control was age matched non-injected C57Bl/6J mice fed a RC diet. Mean  $\pm$  SD.

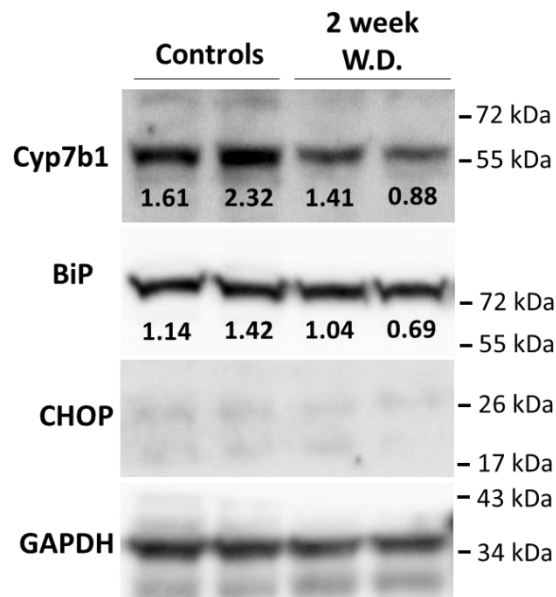

**Supplemental Figure S2: Effect of WD feeding on protein levels of hepatic *Cyp7b1*, *BiP*, and *CHOP* in B6/129 mice.** Male B6/129 mice fed *ad libitum* a WD with 42% of calories from fat and 43% from carbohydrates for 2 weeks to induce fatty liver. All mice were 12 week-old at time of sacrifice. Controls were age-matched B6/129 mice feed with RC. Shown are representative liver protein samples. Band intensity was determined by laser densitometry, and relative levels of *Cyp7b1* and *BiP* expression were normalized by the intensity of *GAPDH*.

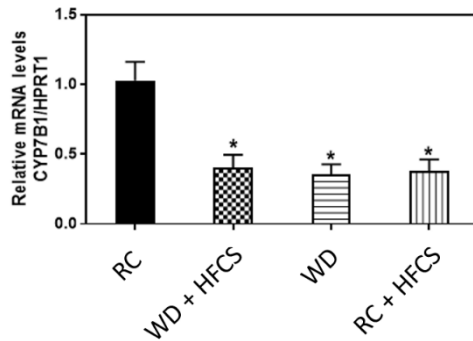

**Supplemental Figure S3: High fructose corn syrup (HFCS) and Western diet (WD) suppressed hepatic *Cyp7b1* mRNA in C57Bl/6J mice.** Male mice were fed one of indicated four diets for 4 weeks: A) RC: standard rodent chow (4% fat and 0.05% cholesterol); B) WD+HFCS: HFCS equivalent combined to WD at final concentration of 2%. C) WD (21% fat and 0.2% cholesterol with casein protein and sucrose/cornstarch carbohydrate); D) RC+HFCS: HFCS equivalent (water containing 55% fructose was combined to with RC at a final concentration of 2%). n=4 for all groups. Student's t-tests were performed between RC fed mice and the mice fed each diet, and significance indicated by \*P<0.01.

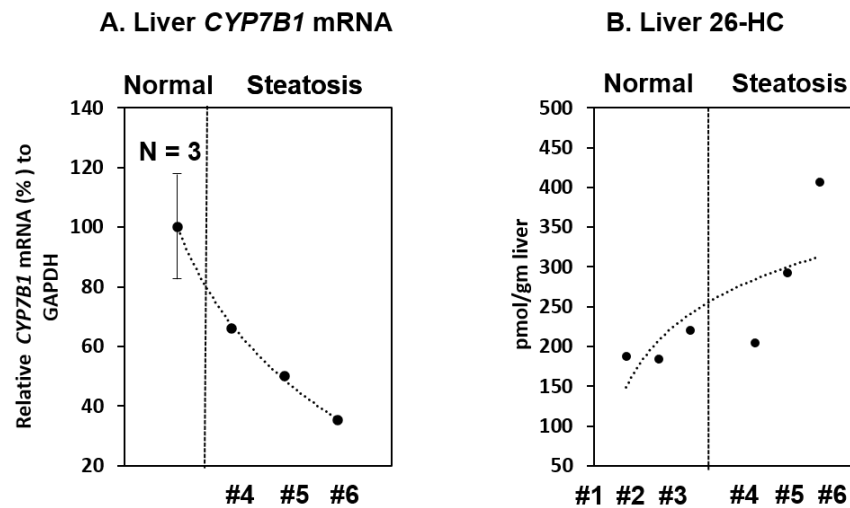

**Supplemental Figure S4: Suppression of CYP7B1 mRNA levels in human steatosis (fatty liver) inversely correlates with increases in (25R)-26-Hydroxycholesterol (26-HC).** 6 male human liver samples were obtained from NIH sponsored Liver Tissue Cell Distribution System (LTCDS) at University of Minnesota. Three of normal histologic appearance and three with steatosis as determined by LTPDS and by our own review of H&E stained liver slides. *CYP7B1* mRNA expression level was lower in steatosis livers than normal livers. 26-HC level in 2 out of three of the steatosis livers was increased. Greatest increases in 26-HC levels were correlated to greatest decreases in *CYP7B1* mRNA liver samples (*i.e.* patients #5 & #6).

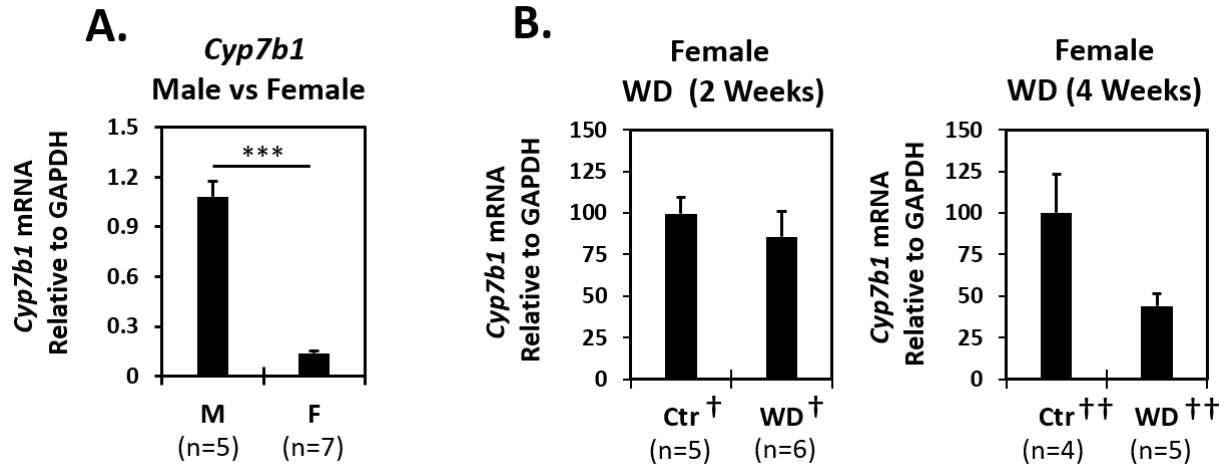

**Supplemental Figure S5: Gender difference in hepatic *Cyp7b1* mRNA expression.** A) Gender difference in the hepatic *Cyp7b1* mRNA expression levels of 12-week-old B6/129 mice fed a RC diet (n=5 for male mice; n=7 for female mice). B) Effect of WD feeding (2 and 4 weeks) on hepatic *Cyp7b1* mRNA expression levels of female B6/129 mice. Control was age-matched female B6/129 mice fed RC. <sup>†</sup>12-week-old at sacrifice. <sup>††</sup>14-week-old at sacrifice. By Welch's t-tests, \*P ≤ 0.05, \*\*P ≤ 0.01, \*\*\*P ≤ 0.001 vs Control.

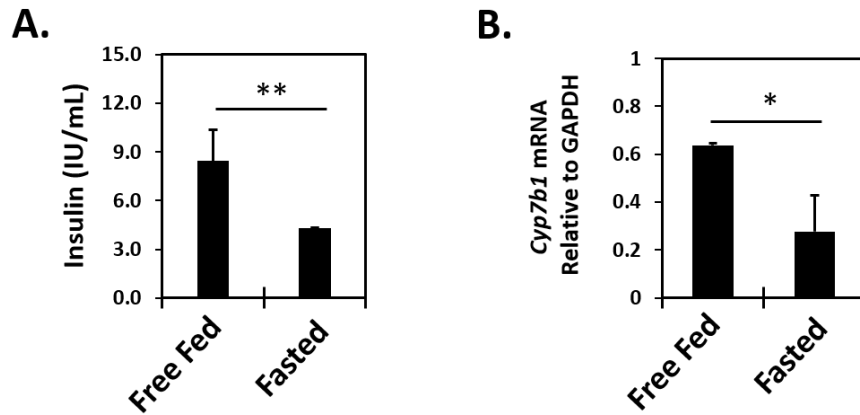

**Supplemental Figure S6: Serum insulin and hepatic *Cyp7b1* mRNA expressions of fasted and non-fasted B6/129 mice.** Male mice were fed a WD for two weeks, and were 12-week-old at sacrifice. A) Comparison of serum insulin levels between fasted (n=3) and free WD fed mice (n=3). B) Comparison of hepatic *Cyp7b1* mRNA expressions between fasted (n=3) and free WD fed mice (n=3). \*P ≤ 0.05, \*\*P ≤ 0.01 by Welch's t-test. Refer to Figure 4 for reference to relative *Cyp7b1* mRNA levels in RC fed mice.

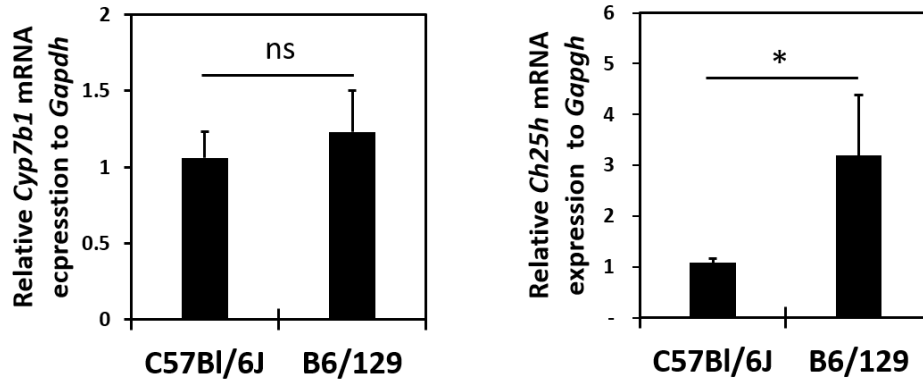

**Supplemental Figure S7: Comparison of hepatic *Cyp7b1* and *Ch25h* mRNA expression levels between C57Bl/6J and B6/129 mice.** All mice were male fed a regular chow diet. At sacrifice, mice were 8-week (C57/Bl/6J) and 11-week (B6/129) old, respectively. Refer to Figure 4 and Figure 6 for relative 25-hydroxycholesyerol and other oxysterol levels of these mice. n=6 for C57Bl/6J; n=4 for B6/129. By Welch's t-test, \* $P \leq 0.05$ .



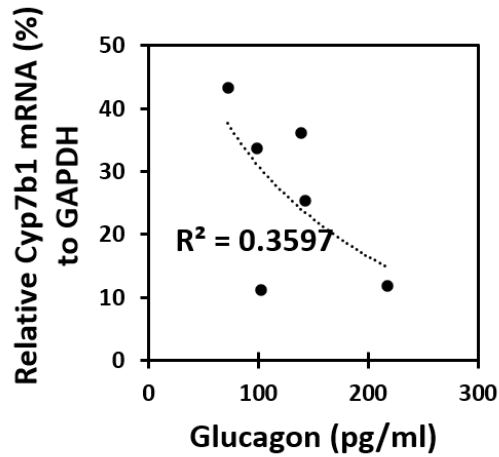

**Supplemental Figure S8: Plasma glucagon concentration inversely correlates to hepatic *Cyp7b1* mRNA expression level in STZ injected C57Bl/6J mice fed RC diet.** 8-week-old C57Bl/6J male mice fed a RC diet were harvested, and hepatic mRNA and plasma glucagon levels were determined. The mice had free access to food until being sacrificed. The dots in the graphs represents each mouse (n=6).

**Supplemental Table S1:** Complete list of abbreviations and names of oxysterols and bile acids analyzed in this study.

| Abbreviations                                                                                                                                  | Name                                                                                                   | MRM ( <i>m/z</i> )        | CE (eV) | R.T. (min) |
|------------------------------------------------------------------------------------------------------------------------------------------------|--------------------------------------------------------------------------------------------------------|---------------------------|---------|------------|
| <b>Oxysterols</b>                                                                                                                              |                                                                                                        |                           |         |            |
| 4 $\beta$ -HC                                                                                                                                  | 4 $\beta$ -Hydroxycholesterol                                                                          | 613.5 $\rightarrow$ 124.1 | 26      | 19.0       |
| 7 $\alpha$ -HC                                                                                                                                 | 7 $\alpha$ -Hydroxycholesterol                                                                         | 613.4 $\rightarrow$ 124.1 | 24      | 17.4       |
| 7 $\beta$ -HC                                                                                                                                  | 7 $\beta$ -Hydroxycholesterol                                                                          | 613.5 $\rightarrow$ 367.4 | 19      | 17.8       |
| 7-KC                                                                                                                                           | 7-Oxocholesterol                                                                                       | 547.4 $\rightarrow$ 383.2 | 23      | 16.9       |
| 20-HC                                                                                                                                          | 20(S)-Hydroxycholesterol                                                                               | 508.4 $\rightarrow$ 124.1 | 26      | 14.6       |
| 22S-HC                                                                                                                                         | 22(S)-Hydroxycholesterol                                                                               | 654.4 $\rightarrow$ 613.3 | 15      | 15.9       |
| 22R-HC                                                                                                                                         | 22(R)-Hydroxycholesterol                                                                               | 654.4 $\rightarrow$ 613.3 | 15      | 15.4       |
| 24-HC                                                                                                                                          | 24(S)-Hydroxycholesterol                                                                               | 613.5 $\rightarrow$ 124.0 | 33      | 16.7       |
| 25-HC                                                                                                                                          | 25-Hydroxycholesterol                                                                                  | 508.4 $\rightarrow$ 124.0 | 24      | 13.3       |
| 26-HC                                                                                                                                          | (25R)-26-Hydroxycholesterol (27-Hydroxycholesterol)                                                    | 613.4 $\rightarrow$ 490.2 | 20      | 18.1       |
| 7 $\alpha$ ,24-diHC                                                                                                                            | 7 $\alpha$ ,24(S)-Dihydroxycholesterol                                                                 | 488.4 $\rightarrow$ 124.0 | 30      | 8.4        |
| 7 $\alpha$ ,25-diHC                                                                                                                            | 7 $\alpha$ ,25-Dihydroxycholesterol                                                                    | 629.5 $\rightarrow$ 124.0 | 26      | 6.5        |
| 7 $\alpha$ ,26-diHC                                                                                                                            | (25R)-7 $\alpha$ ,26-Dihydroxycholesterol                                                              | 488.4 $\rightarrow$ 124.0 | 38      | 9.4        |
| <b>Cholic acid (3<math>\alpha</math>,7<math>\alpha</math>,12<math>\alpha</math>-Trihydroxy-5<math>\beta</math>-cholanoic acid) related BAs</b> |                                                                                                        |                           |         |            |
| CA                                                                                                                                             | Cholic acid                                                                                            | 407.3 $\rightarrow$ 343.3 | 33      | 41.8       |
| GCA                                                                                                                                            | Glycocholic acid                                                                                       | 464.5 $\rightarrow$ 74.2  | 52      | 28.5       |
| TCA                                                                                                                                            | Taurocholic acid                                                                                       | 514.3 $\rightarrow$ 124.0 | 56      | 30.3       |
| CA-3S                                                                                                                                          | Cholic acid 3-sulfate                                                                                  | 487.3 $\rightarrow$ 97.0  | 46      | 31.6       |
| CA-7S                                                                                                                                          | Cholic acid 7-sulfate                                                                                  | 487.3 $\rightarrow$ 97.0  | 46      | 30.6       |
| CA-3G                                                                                                                                          | Cholic acid-3-glucuronide                                                                              | 583.3 $\rightarrow$ 113.1 | 45      | 22.5       |
| GCA-3S                                                                                                                                         | Glycocholic acid 3-sulfate                                                                             | 544.4 $\rightarrow$ 464.1 | 25      | 14.5       |
| TCA-3S                                                                                                                                         | Taurocholic acid 3-sulfate                                                                             | 594.4 $\rightarrow$ 514.0 | 46      | 15.1       |
| TCA-7S                                                                                                                                         | Taurocholic acid 7-sulfate                                                                             | 594.3 $\rightarrow$ 514.1 | 25      | 14.4       |
| norCA                                                                                                                                          | Nor-cholic acid (24-Nor-3 $\alpha$ ,7 $\alpha$ ,12 $\alpha$ -trihydroxy-5 $\beta$ -cholan-23-oic acid) | 393.3 $\rightarrow$ 329.2 | 34      | 34.2       |
| G-norCA                                                                                                                                        | Glyco norcholic acid                                                                                   | 450.3 $\rightarrow$ 74.1  | 37      | 17.3       |
| T-norCA                                                                                                                                        | Tauro norcholic acid                                                                                   | 500.3 $\rightarrow$ 124.1 | 52      | 18.7       |

|                                                                                                                                   |                                                                                                 |               |    |      |
|-----------------------------------------------------------------------------------------------------------------------------------|-------------------------------------------------------------------------------------------------|---------------|----|------|
| isoCA                                                                                                                             | Isocholic acid (3 $\beta$ ,7 $\alpha$ ,12 $\alpha$ -Trihydroxy-5 $\beta$ -cholan-24-oic acid)   | 407.3 → 343.3 | 33 | 33.7 |
| 7-epiCA                                                                                                                           | 7-Epicholic acid (3 $\alpha$ ,7 $\beta$ ,12 $\alpha$ -Trihydroxy-5 $\beta$ -cholan-24-oic acid) | 407.3 → 343.2 | 34 | 26.9 |
| <b>Chenodeoxycholic acid (3<math>\alpha</math>,7<math>\alpha</math>-Dihydroxy-5<math>\beta</math>-cholanoic acid) related BAs</b> |                                                                                                 |               |    |      |
| CDCA                                                                                                                              | Chenodeoxycholic acid                                                                           | 437.3 → 391.2 | 23 | 51.1 |
| GCDCA                                                                                                                             | Glycochenodeoxycholic acid                                                                      | 448.3 → 74.2  | 34 | 38.2 |
| TCDCA                                                                                                                             | Taurochenodeoxycholic acid                                                                      | 498.3 → 80.0  | 76 | 39.2 |
| CDCA-3S                                                                                                                           | Chenodeoxycholic acid 3-sulfate                                                                 | 471.3 → 97.0  | 56 | 40.5 |
| GCDCA-3S                                                                                                                          | Glycochenodeoxycholic acid 3-sulfate                                                            | 528.4 → 448.1 | 31 | 22.3 |
| TCDCA-3S                                                                                                                          | Taurochenodeoxycholic acid 3-sulfate                                                            | 578.4 → 498.1 | 25 | 23.1 |
| CDCA-3G                                                                                                                           | Chenodeoxycholic acid 3-glucuronide                                                             | 567.3 → 391.1 | 41 | 35.1 |
| <b>Ursodeoxycholic acid (3<math>\alpha</math>,7<math>\beta</math>-Dihydroxy-5<math>\beta</math>-cholanoic acid) related BAs</b>   |                                                                                                 |               |    |      |
| UDCA                                                                                                                              | Ursodeoxycholic acid                                                                            | 437.3 → 391.2 | 23 | 44.0 |
| GUDCA                                                                                                                             | Glycoursodeoxycholic acid                                                                       | 448.3 → 74.2  | 40 | 26.6 |
| TUDCA                                                                                                                             | Tauroursodeoxycholic acid                                                                       | 498.3 → 80.0  | 71 | 28.7 |
| UDCA-3S                                                                                                                           | Ursodeoxycholic acid 3-sulfate                                                                  | 471.3 → 97.0  | 46 | 31.4 |
| UDCA-3G                                                                                                                           | Ursodeoxycholic acid 3-glucuronide                                                              | 567.3 → 391.1 | 39 | 22.8 |
| GUDCA-3S                                                                                                                          | Glycoursodeoxycholic acid 3-sulfate                                                             | 528.4 → 448.3 | 32 | 12.5 |
| TUDCA-3S                                                                                                                          | Tauroursodeoxycholic acid 3-sulfate                                                             | 578.4 → 498.1 | 25 | 13.1 |
| UDCA-7GlcNAc                                                                                                                      | Urosodeoxycholic acid 7- <i>N</i> -acetylglucosaminide                                          | 594.4 → 391.2 | 38 | 32.8 |
| GUDCA-7GlcNAc                                                                                                                     | Glycoursodeoxycholic acid 7- <i>N</i> -acetylglucosaminide                                      | 651.4 → 100.1 | 55 | 17.0 |
| TUDCA-7GlcNAc                                                                                                                     | Tauroursodeoxycholic acid 7- <i>N</i> -acetylglucosaminide                                      | 701.4 → 480.2 | 62 | 18.7 |
| UDCA-3S-7GlcNAc                                                                                                                   | Ursodeoxycholic acid 3-sulfate,7- <i>N</i> -acetylglucosaminide                                 | 674.4 → 96.8  | 69 | 20.3 |
| GUDCA-3S-7GlcNAc                                                                                                                  | Glycoursodeoxycholic acid 3-sulfate,7- <i>N</i> -acetylglucosaminide                            | 365.2 → 74.0  | 26 | 9.4  |
| TUDCA-3S-7GlcNAc                                                                                                                  | Tauroursodeoxycholic acid 3-sulfate, 7- <i>N</i> -acetylglucosaminide                           | 390.2 → 97.0  | 56 | 9.8  |
| <b>Deoxycholic acid (3<math>\alpha</math>,12<math>\alpha</math>-Dihydroxy-5<math>\beta</math>-cholanoic acid) related BAs</b>     |                                                                                                 |               |    |      |
| DCA                                                                                                                               | Deoxycholic acid                                                                                | 391.3 → 345.3 | 34 | 51.8 |
| GDCA                                                                                                                              | Glycodeoxycholic acid                                                                           | 448.3 → 74.1  | 38 | 39.7 |
| TDCA                                                                                                                              | Taurodeoxycholic acid                                                                           | 498.3 → 124.0 | 52 | 40.6 |

|                                                                                                                                                      |                                                                                                         |                |    |      |
|------------------------------------------------------------------------------------------------------------------------------------------------------|---------------------------------------------------------------------------------------------------------|----------------|----|------|
| DCA-3S                                                                                                                                               | Deoxycholic acid 3-sulfate                                                                              | 471.3 → 97.1   | 65 | 41.0 |
| GDCA-3S                                                                                                                                              | Glycodeoxycholic acid                                                                                   | 528.4 → 448.0  | 30 | 23.8 |
| TDCA-3S                                                                                                                                              | Taurodeoxycholic acid 3-sulfate                                                                         | 578.4 → 498.1  | 30 | 24.6 |
| DCA-3G                                                                                                                                               | Deoxycholic acid 3-glucuronide                                                                          | 567.3 → 391.3  | 40 | 34.1 |
| <b>Lithocholic acid (3<math>\alpha</math>-hydroxy-5<math>\beta</math>-cholanoic acid) related BAs</b>                                                |                                                                                                         |                |    |      |
| LCA                                                                                                                                                  | Lithocholic acid                                                                                        | 375.3 → 375.3* | 10 | 61.2 |
| GLCA                                                                                                                                                 | Glycolithocholic acid                                                                                   | 432.3 → 74.1   | 40 | 46.6 |
| TLCA                                                                                                                                                 | Taurolithocholic acid                                                                                   | 482.3 → 80.0   | 76 | 47.4 |
| LCA-3S                                                                                                                                               | Lithocholic acid 3-sulfate                                                                              | 455.3 → 97.1   | 63 | 47.5 |
| LCA-3G                                                                                                                                               | Lithocholic acid 3-glucuronide                                                                          | 551.3 → 375.3  | 39 | 41.2 |
| GLCA-3S                                                                                                                                              | Glycolithocholic acid 3-sulfate                                                                         | 512.4 → 432.0  | 30 | 33.3 |
| TLCA-3S                                                                                                                                              | Taurolithocholic acid 3-sulfate                                                                         | 562.4 → 482.2  | 23 | 33.8 |
| isoLCA                                                                                                                                               | Isolithocholic acid (3 $\beta$ -Hydroxy-5 $\beta$ -cholan-24-oic acid)                                  | 375.3 → 375.3* | 30 | 59.8 |
| alloLCA                                                                                                                                              | Allolithocholic acid (3 $\beta$ -Hydroxy-5 $\alpha$ -cholan-24-oic acid)                                | 375.4 → 375.4* | 10 | 61.8 |
| iso-alloLCA                                                                                                                                          | Isoalloolithocholic acid (3 $\beta$ -Hydroxy-5 $\alpha$ -cholan-24-oic acid)                            | 375.3 → 375.3* | 10 | 58.9 |
| <b>Hyo- and muricholic acid (3<math>\alpha</math>,6<math>\xi</math>,7<math>\xi</math>-Trihydroxy-5<math>\beta</math>-cholanoic acid) related BAs</b> |                                                                                                         |                |    |      |
| HCA                                                                                                                                                  | Hyochoolic acid (3 $\alpha$ ,6 $\alpha$ ,7 $\alpha$ -Trihydroxy-5 $\beta$ -cholan-24-oic acid)          | 407.3 → 407.3* | 10 | 40.2 |
| GHCA                                                                                                                                                 | Glycohyodeoxycholic acid                                                                                | 464.3 → 74.1   | 38 | 22.6 |
| THCA                                                                                                                                                 | Taurohyocholic acid                                                                                     | 514.3 → 124.1  | 54 | 24.3 |
| HCA-3G                                                                                                                                               | Hyochoolic acid 3-glucuronide                                                                           | 583.3 → 407.2  | 44 | 24.2 |
| $\alpha$ MCA                                                                                                                                         | $\alpha$ -Muricholic acid (3 $\alpha$ ,6 $\beta$ ,7 $\alpha$ -Trihydroxy-5 $\beta$ -cholan-24-oic acid) | 453.3 → 407.2  | 21 | 35.9 |
| $\alpha$ MCA-3S                                                                                                                                      | $\alpha$ -Muricholic acid 3-sulfate                                                                     | 487.3 → 97.0   | 45 | 24.8 |
| T- $\alpha$ MCA                                                                                                                                      | Tauro $\alpha$ -muricholic acid                                                                         | 514.4 → 80.1   | 73 | 18.3 |
| T- $\alpha$ MCA-3S                                                                                                                                   | Tauro $\alpha$ -muricholic acid 3-sulfate                                                               | 594.4 → 514.1  | 35 | 10.3 |
| $\beta$ MCA                                                                                                                                          | $\beta$ -Murocholic acid (3 $\alpha$ ,6 $\beta$ ,7 $\beta$ -Trihydroxy-5 $\beta$ -cholan-24-oic acid)   | 453.3 → 407.3  | 26 | 37.5 |
| T- $\beta$ MCA                                                                                                                                       | Tauro $\beta$ -muricholic acid 3-sulfate                                                                | 487.3 → 97.0   | 52 | 25.8 |
| $\beta$ MCA-3S                                                                                                                                       | $\beta$ -Muricholic acid 3-sulfate                                                                      | 514.4 → 124.2  | 53 | 19.0 |
| T- $\beta$ MCA-3S                                                                                                                                    | Tauro $\beta$ -muricholic acid 3-sulfate                                                                | 594.4 → 514.3  | 35 | 10.3 |
| $\omega$ MCA                                                                                                                                         | $\omega$ -Muricholic acid (3 $\alpha$ ,6 $\alpha$ ,7 $\beta$ -Trihydroxy-5 $\beta$ -cholan-24-oic acid) | 453.3 → 407.2  | 20 | 34.3 |

|                                                                                                                                     |                                                                                                                              |                            |    |      |
|-------------------------------------------------------------------------------------------------------------------------------------|------------------------------------------------------------------------------------------------------------------------------|----------------------------|----|------|
| T- $\omega$ MCA                                                                                                                     | Tauro $\omega$ -muricholic acid                                                                                              | 514.4 $\rightarrow$ 80.0   | 71 | 17.2 |
| $\Delta^{22}$ - $\beta$ MCA                                                                                                         | 3 $\alpha$ ,6 $\beta$ ,7 $\beta$ -Trihydroxychol-5,22-diene-24-oic acid                                                      | 405.3 $\rightarrow$ 323.2  | 32 | 34.9 |
| T- $\Delta^{22}$ - $\beta$ MCA                                                                                                      | Tauro 3 $\alpha$ ,6 $\beta$ ,7 $\beta$ -trihydroxychol-5,22-diene-24-oic acid                                                | 512.4 $\rightarrow$ 80.1   | 60 | 20.0 |
| <b>Hyo- and Muri- deoxycholic (3<math>\alpha</math>,6<math>\xi</math>-Dihydroxy-5<math>\beta</math>-cholanoic acid) related BAs</b> |                                                                                                                              |                            |    |      |
| HDCA                                                                                                                                | Hyodeoxycholic acid (3 $\alpha$ ,6 $\alpha$ -Dihydroxy-5 $\beta$ -cholan-24-oic acid)                                        | 391.3 $\rightarrow$ 391.3* | 10 | 44.6 |
| MDCA                                                                                                                                | Murideoxycholic acid (3 $\alpha$ ,6 $\beta$ -Dihydroxy-5 $\beta$ -cholan-24-oic acid)                                        | 437.3 $\rightarrow$ 391.3  | 22 | 41.8 |
| GHDCA                                                                                                                               | Glycohyodeoxycholic acid                                                                                                     | 448.3 $\rightarrow$ 74.1   | 40 | 27.6 |
| THDCA                                                                                                                               | Taurohyodeoxycholic acid                                                                                                     | 498.3 $\rightarrow$ 80.0   | 72 | 29.8 |
| HDCA-3G                                                                                                                             | Hyodeoxycholic acid 3-glucuronide                                                                                            | 567.3 $\rightarrow$ 391.2  | 41 | 30.2 |
| <b>Tetrahydroxy bile acids</b>                                                                                                      |                                                                                                                              |                            |    |      |
| CA-1 $\beta$ -ol                                                                                                                    | 1 $\beta$ -Hydroxycholic acid (1 $\beta$ ,3 $\alpha$ ,7 $\alpha$ ,12 $\alpha$ -Tetrahydroxy-5 $\beta$ -cholan-24-oic acid)   | 423.3 $\rightarrow$ 263.0  | 35 | 17.6 |
| GCA-1 $\beta$ -ol                                                                                                                   | Glyco 1 $\beta$ -hydroxycholic acid                                                                                          | 480.3 $\rightarrow$ 74.1   | 40 | 9.3  |
| TCA-1 $\beta$ -ol                                                                                                                   | Tauro 1 $\beta$ -hydroxycholic acid                                                                                          | 530.4 $\rightarrow$ 124.1  | 53 | 9.8  |
| CA-6 $\alpha$ -ol                                                                                                                   | 6 $\alpha$ -Hydroxycholic acid (3 $\alpha$ ,6 $\alpha$ ,7 $\alpha$ ,12 $\alpha$ -Tetrahydroxy-5 $\beta$ -cholan-24-oic acid) | 423.3 $\rightarrow$ 313.3  | 35 | 25.0 |
| GCA-6 $\alpha$ -ol                                                                                                                  | Glyco 6 $\alpha$ -hydroxycholic acid                                                                                         | 480.3 $\rightarrow$ 74.1   | 39 | 12.9 |
| TCA-6 $\alpha$ -ol                                                                                                                  | Tauro 6 $\alpha$ -hydroxycholic acid                                                                                         | 530.4 $\rightarrow$ 124.1  | 55 | 13.9 |
| CDCA-1 $\beta$ -ol                                                                                                                  | 1 $\beta$ -Hydroxychenodeoxycholic acid (1 $\beta$ ,3 $\alpha$ ,7 $\alpha$ -Trihydroxy-5 $\beta$ -cholan-24-oic acid)        | 407.2 $\rightarrow$ 389.1  | 33 | 29.4 |
| <b>BA with 3<math>\beta</math>-hydroxy-<math>\Delta^5</math> structure</b>                                                          |                                                                                                                              |                            |    |      |
| isoLCA- $\Delta^5$                                                                                                                  | 3 $\beta$ -Hydroxy-5-cholen-24-oic acid                                                                                      | 373.3 $\rightarrow$ 373.3* | 30 | 57.3 |
| G-isoLCA- $\Delta^5$                                                                                                                | Glyco 3 $\beta$ -hydroxy-5-cholen-24-oic acid                                                                                | 430.3 $\rightarrow$ 73.9   | 31 | 39.1 |
| T-isoLCA- $\Delta^5$                                                                                                                | Tauro 3 $\beta$ -hydroxy-5-cholen-24-oic acid                                                                                | 480.3 $\rightarrow$ 80.0   | 63 | 40.3 |
| isoLCA- $\Delta^5$ -3S                                                                                                              | 3 $\beta$ -Hydroxy-5-cholen-24-oic acid 3-sulfate                                                                            | 453.3 $\rightarrow$ 97.0   | 40 | 43.6 |
| G-isoLCA- $\Delta^5$ -3S                                                                                                            | Glyco 3 $\beta$ -hydroxy-5-cholen-24-oic acid 3-sulfate                                                                      | 510.4 $\rightarrow$ 97.1   | 50 | 23.5 |
| T-isoLCA- $\Delta^5$ -3S                                                                                                            | Tauro 3 $\beta$ -hydroxy-5-cholen-24-oic acid 3-sulfate                                                                      | 279.7 $\rightarrow$ 97.0   | 35 | 24.5 |
| isoCDCA- $\Delta^5$                                                                                                                 | 3 $\beta$ ,7 $\alpha$ -Dihydroxy-5-cholen-24-oic acid                                                                        | 389.3 $\rightarrow$ 389.3* | 10 | 41.7 |
| G-isoCDCA- $\Delta^5$                                                                                                               | Glyco 3 $\beta$ ,7 $\alpha$ -dihydroxy-5-cholen-24-oic acid                                                                  | 446.3 $\rightarrow$ 74.1   | 32 | 23.8 |
| T-isoCDCA- $\Delta^5$                                                                                                               | Tauro 3 $\beta$ ,7 $\alpha$ -dihydroxy-5-cholen-24-oic acid                                                                  | 496.3 $\rightarrow$ 80.0   | 75 | 25.8 |
| isoCDCA- $\Delta^5$ -3S                                                                                                             | 3 $\beta$ ,7 $\alpha$ -Dihydroxy-5-cholen-24-oic acid 3-sulfate                                                              | 469.3 $\rightarrow$ 97.0   | 35 | 36.4 |

|                                                       |                                                                                             |                |    |      |
|-------------------------------------------------------|---------------------------------------------------------------------------------------------|----------------|----|------|
| G-isoCDCA- $\Delta^5$ -3S                             | Glyco 3 $\beta$ ,7 $\alpha$ -dihydroxy-5-cholen-24-oic acid 3-sulfate                       | 526.4 → 96.8   | 33 | 16.2 |
| T-isoCDCA- $\Delta^5$ -3S                             | Tauro 3 $\beta$ ,7 $\alpha$ -dihydroxy-5-cholen-24-oic acid 3-sulfate                       | 287.7 → 97.0   | 24 | 17.0 |
| isoUDCA- $\Delta^5$                                   | 3 $\beta$ ,7 $\beta$ -Dihydroxy-5-cholen-24-oic acid                                        | 389.3 → 389.3* | 10 | 43.2 |
| isoUDCA- $\Delta^5$ -3S                               | 3 $\beta$ -Sulfoxy,7 $\beta$ -hydroxy-5-cholen-24-oic acid                                  | 469.3 → 96.9   | 35 | 29.3 |
| isoUDCA- $\Delta^5$ -3S-7-GlcNAc                      | 3 $\beta$ -Sulfoxy,7 $\beta$ -( <i>N</i> -acetylglucosaminyloxy)-5-cholen-24-oic acid       | 672.4 → 97.1   | 45 | 19.8 |
| G-isoUDCA- $\Delta^5$ -3S-7-GlcNAc                    | Glyco 3 $\beta$ -sulfoxy,7 $\beta$ -( <i>N</i> -acetylglucosaminyloxy)-5-cholen-24-oic acid | 364.2 → 97.0   | 33 | 8.7  |
| T-isoUDCA- $\Delta^5$ -3S-7-GlcNAc                    | Tauro 3 $\beta$ -sulfoxy,7 $\beta$ -( <i>N</i> -acetylglucosaminyloxy)-5-cholen-24-oic acid | 389.2 → 97.0   | 31 | 9.2  |
| isoDCA- $\Delta^5$                                    | 3 $\beta$ ,12 $\alpha$ -Dihydroxy-5-cholen-24-oic acid                                      | 389.3 → 287.2  | 32 | 42.5 |
| isoCA- $\Delta^5$                                     | 3 $\beta$ ,7 $\alpha$ ,12 $\alpha$ -Trihydroxy-5-cholen-24-oic acid                         | 405.3 → 289.2  | 33 | 29.0 |
| isoCA- $\Delta^5$ -3S                                 | 3 $\beta$ ,7 $\alpha$ ,12 $\alpha$ -Trihydroxy-5-cholen-24-oic acid 3-sulfate               | 485.3 → 97.0   | 66 | 23.4 |
| G-isoCA- $\Delta^5$                                   | Glyco 3 $\beta$ ,7 $\alpha$ ,12 $\alpha$ -trihydroxy-5-cholen-24-oic acid                   | 462.4 → 74.1   | 43 | 14.2 |
| T-isoCA- $\Delta^5$                                   | Tauro 3 $\beta$ ,7 $\alpha$ ,12 $\alpha$ -trihydroxy-5-cholen-24-oic acid                   | 512.4 → 124.0  | 47 | 15.3 |
| G-isoCA- $\Delta^5$ -3S                               | Glyco 3 $\beta$ ,7 $\alpha$ ,12 $\alpha$ -trihydroxy-5-cholen-24-oic acid 3-sulfate         | 542.4 → 97.1   | 67 | 10.7 |
| T-isoCA- $\Delta^5$ -3S                               | Tauro 3 $\beta$ ,7 $\alpha$ ,12 $\alpha$ -trihydroxy-5-cholen-24-oic acid 3-sulfate         | 295.7 → 97.0   | 25 | 11.2 |
| <b>BAs with <math>\Delta^4</math>-3-one structure</b> |                                                                                             |                |    |      |
| DhCA- $\Delta^4$                                      | 7 $\alpha$ ,12 $\alpha$ -dihydroxy-3-oxo-4-cholen-24-oic acid                               | 403.3 → 123.2  | 40 | 31.2 |
| G-DhCA- $\Delta^4$                                    | Glyco 7 $\alpha$ ,12 $\alpha$ -dihydroxy-3-oxo-4-cholen-24-oic acid                         | 460.3 → 74.1   | 38 | 16.3 |
| T-DhCA- $\Delta^4$                                    | Tauro 7 $\alpha$ ,12 $\alpha$ -dihydroxy-3-oxo-4-cholen-24-oic acid                         | 510.3 → 358.2  | 52 | 17.5 |
| DhCDCA- $\Delta^4$                                    | 7 $\alpha$ -Hydroxy-3-oxo-4-cholen-24-oic acid                                              | 387.3 → 369.3  | 28 | 45.3 |
| G-DhCDCA- $\Delta^4$                                  | Glyco 7 $\alpha$ -hydroxy-3-oxo-4-cholen-24-oic acid                                        | 444.3 → 74.1   | 35 | 27.9 |
| T-DhCDCA- $\Delta^4$                                  | Tauro 7 $\alpha$ -hydroxy-3-oxo-4-cholen-24-oic acid                                        | 494.3 → 342.1  | 51 | 30.1 |
| DhDCA- $\Delta^{4,6}$                                 | 12 $\alpha$ -Hydroxy-3-oxo-4,6-choldien-24-oic acid                                         | 385.3 → 341.2  | 26 | 42.5 |
| DhLCA- $\Delta^{4,6}$                                 | 3-Oxo-4,6-choldien-24-oic acid                                                              | 369.3 → 325.3  | 29 | 56.2 |
| DhLCA- $\Delta^4$ -3-one                              | 3-Oxo-4-cholen-24-oic acid                                                                  | 371.3 → 123.1  | 32 | 59.1 |
| <b>Keto Bile Acids</b>                                |                                                                                             |                |    |      |
| DhLCA                                                 | Dehydrolithocholic acid (3-Oxo-5 $\beta$ -cholan-24-oic acid)                               | 373.3 → 373.3* | 10 | 62.0 |
| 7-OxoDCA                                              | 3 $\alpha$ ,12 $\alpha$ -Dihydroxy-7-oxo-5 $\beta$ -cholan-24-oic acid                      | 405.3 → 289.2  | 35 | 35.5 |

|                                                  |                                                                              |                            |    |      |
|--------------------------------------------------|------------------------------------------------------------------------------|----------------------------|----|------|
| 7-OxoLCA                                         | 3 $\alpha$ -Hydroxy-7-oxo-5 $\beta$ -cholan-24-oic acid                      | 435.3 $\rightarrow$ 389.2  | 21 | 47.2 |
| 12-OxoCDCA                                       | 3 $\alpha$ ,7 $\alpha$ -Dihydroxy-12-oxo-5 $\beta$ -cholan-24-oic acid       | 447.3 $\rightarrow$ 405.3  | 27 | 38.6 |
| 12-OxoLCA                                        | 3 $\alpha$ -Hydroxy-12-oxo-5 $\beta$ -cholanoic acid                         | 389.3 $\rightarrow$ 371.3  | 30 | 47.8 |
| 7-Oxo-isoLCA- $\Delta^5$                         | 3 $\beta$ -Hydroxy-7-oxo-5-cholen-24-oic acid)                               | 387.2 $\rightarrow$ 287.4  | 32 | 45.2 |
| <b>BA with Cholestan or Cholesten structures</b> |                                                                              |                            |    |      |
| C27-DHCA                                         | 3 $\alpha$ ,7 $\alpha$ -Dihydroxy-5 $\beta$ -cholestanoic acid               | 433.3 $\rightarrow$ 415.3  | 40 | 61.3 |
| C27-THCA                                         | 3 $\alpha$ ,7 $\alpha$ ,12 $\alpha$ -Trihydroxy-5 $\beta$ -cholestanoic acid | 449.4 $\rightarrow$ 431.1  | 40 | 53.7 |
| 3 $\beta$ -HCA                                   | (25R)-3 $\beta$ -Hydroxy-5-cholest-26-oic acid                               | 415.4 $\rightarrow$ 415.4* | 15 | 64.8 |
| C27- $\Delta^5$ -3 $\beta$ ,7 $\alpha$ -diol     | (25R)-3 $\beta$ ,7 $\alpha$ -Dihydroxy-5-cholest-26-oic acid                 | 431.3 $\rightarrow$ 431.3* | 15 | 56.3 |
| C27- $\Delta^5$ -3 $\beta$ ,24S-diol             | (25R)-3 $\beta$ ,7 $\alpha$ ,24(S)-Trihydroxy-5-cholest-26-oic acid          | 431.3 $\rightarrow$ 73.0   | 25 | 52.6 |
| C27- $\Delta^4$ -3-one                           | (25R)-3-Oxocholest-4-en-26-oic acid                                          | 413.4 $\rightarrow$ 413.4* | 15 | 65.2 |
| C27-7 $\alpha$ -OH- $\Delta^4$ -3-one            | (25R)-7 $\alpha$ -Hydroxy-3-oxocholest-4-en-26-oic acid                      | 429.4 $\rightarrow$ 411.3  | 32 | 58.1 |

† Total bile acid (TBA) in this manuscript means sum of above bile acid concentrations.

\* Due to lack of fragmentation, the same mass was monitored for both parent and daughter ions.

**Supplemental Table S2:** Primers used for mRNA analysis

|                | Forward                         | Reverse                        |
|----------------|---------------------------------|--------------------------------|
| <i>Cyp7a1</i>  | GAG AAG GCA AAC GGG TGA AC      | GGA TTG GCA CCA AAT TGC AGA    |
| <i>Cyp7b1</i>  | CCC TCT TTC CTC CAC TCA TA      | GAA CCG ATC GAA CCT AAA TTC CT |
| <i>Cyp8b1</i>  | GCC TTC AAG TAT GAT CGG TTC CT  | GAT CTT CTT GCC CGA CTT GTA GA |
| <i>Cyp27a1</i> | CTA TGT GCT GCA CTT GCC C       | GGG CAC TAG CCA GAT TCA CA     |
| <i>Ch25h</i>   | TGC TAC AAC GGT TCG GAG C       | AGA AGC CCA CGT AAG TGA TGA T  |
| <i>Ccl24</i>   | TGC CCT AGC ATT TTG GCG A       | ACC TCC TGT AGT TTG GGA TGC    |
| <i>Chi3l3</i>  | GAA TGA AGG AGC CAC TGA GGT CTG | TTG AGC CAC TGA GCC TTC AAC TT |
| <i>Rorc</i>    | AAA GAA GAC CCA CAC CTC ACA AAT | GGT GAT AAC CCC GTA GTG GA     |
| <i>StarD1</i>  | ACG AGG GCT AGG GCC AAA T       | CAG ACC CCT TAT GCC TCC C      |
| <i>Gata3</i>   | GCT CCT TGC TAC TCA GGT GAT     | GGA GGG AGA GAG GAA TCC GA     |
| <i>Arg1</i>    | ACA AGA CAG GGC TCC TTT CAG     | TGG TTA CCC TCC CGT TGA GT     |
| <i>Nos2</i>    | GGG ACT GAG CTG TTA GAG ACA     | TGC ACT TCT GCT CCA AAT CCA    |
| <i>Tbp</i>     | TTT GGC TAG GTT TCT GCG GT      | TGA AAT AGT GAT GCT GGG CA CT  |



**Supplemental Table S3:** Body weight, liver Lipids and serum parameters of timed WD fed female B6/129 mice

|                                 | Control<br>(RC) | Length of WD feeding |                 |
|---------------------------------|-----------------|----------------------|-----------------|
|                                 |                 | 2 Weeks              | 4 Weeks         |
| Body Weight (gm)                | 27.3 ± 1.83     | 34.0 ± 1.96 *        | 42.8 ± 1.95 *** |
| Liver triglyceride (mg/g)       | 29.1 ± 4.90     | 188 ± 37.7 **        | 322 ± 70.5 **   |
| Liver total cholesterol (mg/g)  | 3.69 ± 0.616    | 11.3 ± 0.638 ***     | 23.7 ± 1.33 *** |
| Serum triglyceride (mg/dL)      | 62.9 ± 3.85     | 61.0 ± 6.42          | 63.0 ± 3.34     |
| Serum total cholesterol (mg/dL) | 131 ± 7.32      | 188 ± 9.15 ***       | 252 ± 15.6 ***  |
| ALT (U/mL)                      | 26.9 ± 2.17     | 48.7 ± 4.97 **       | 83.7 ± 16.2 *   |
| AST (U/mL)                      | 79.0 ± 5.73     | 100 ± 4.81 *         | 164 ± 33.7 *    |
| Serum glucose (mg/dL)           | 288 ± 20.1      | 283 ± 5.74           | 289 ± 15.1      |
| Serum insulin (ng/mL)           | 0.438 ± 0.0967  | 0.430 ± 0.128        | 1.07 ± 0.240 *  |
| HOMA-IR                         | 0.317 ± 0.0772  | 0.306 ± 0.0945       | 0.767 ± 0.183   |

† B6/129 mice fed WD for two (n=6) and four (n=6) weeks. They were 12-week-old and 14-week-old at sacrifice, respectively; Control was 12-week-old B6/129 mice fed a RC (n=7).

††Values are expressed as mean ±SE

††† By Welch's t-test, \*P<0.05, \*\*P<0.01, \*\*\*p<0.001 vs Control group (RC).
